# Supplementary material for: Effect of Snowmelt on Groundwater Bacterial Community Composition and Potential Role of Surface Environments as Microbial Seed Bank in Two Distinct Aquifers from the Region of Quebec, Canada
Source: MDPI journal article supplement (doi:10.3390/microorganisms11061526), 2023-06-08
Supplement: s1 [file s1]

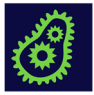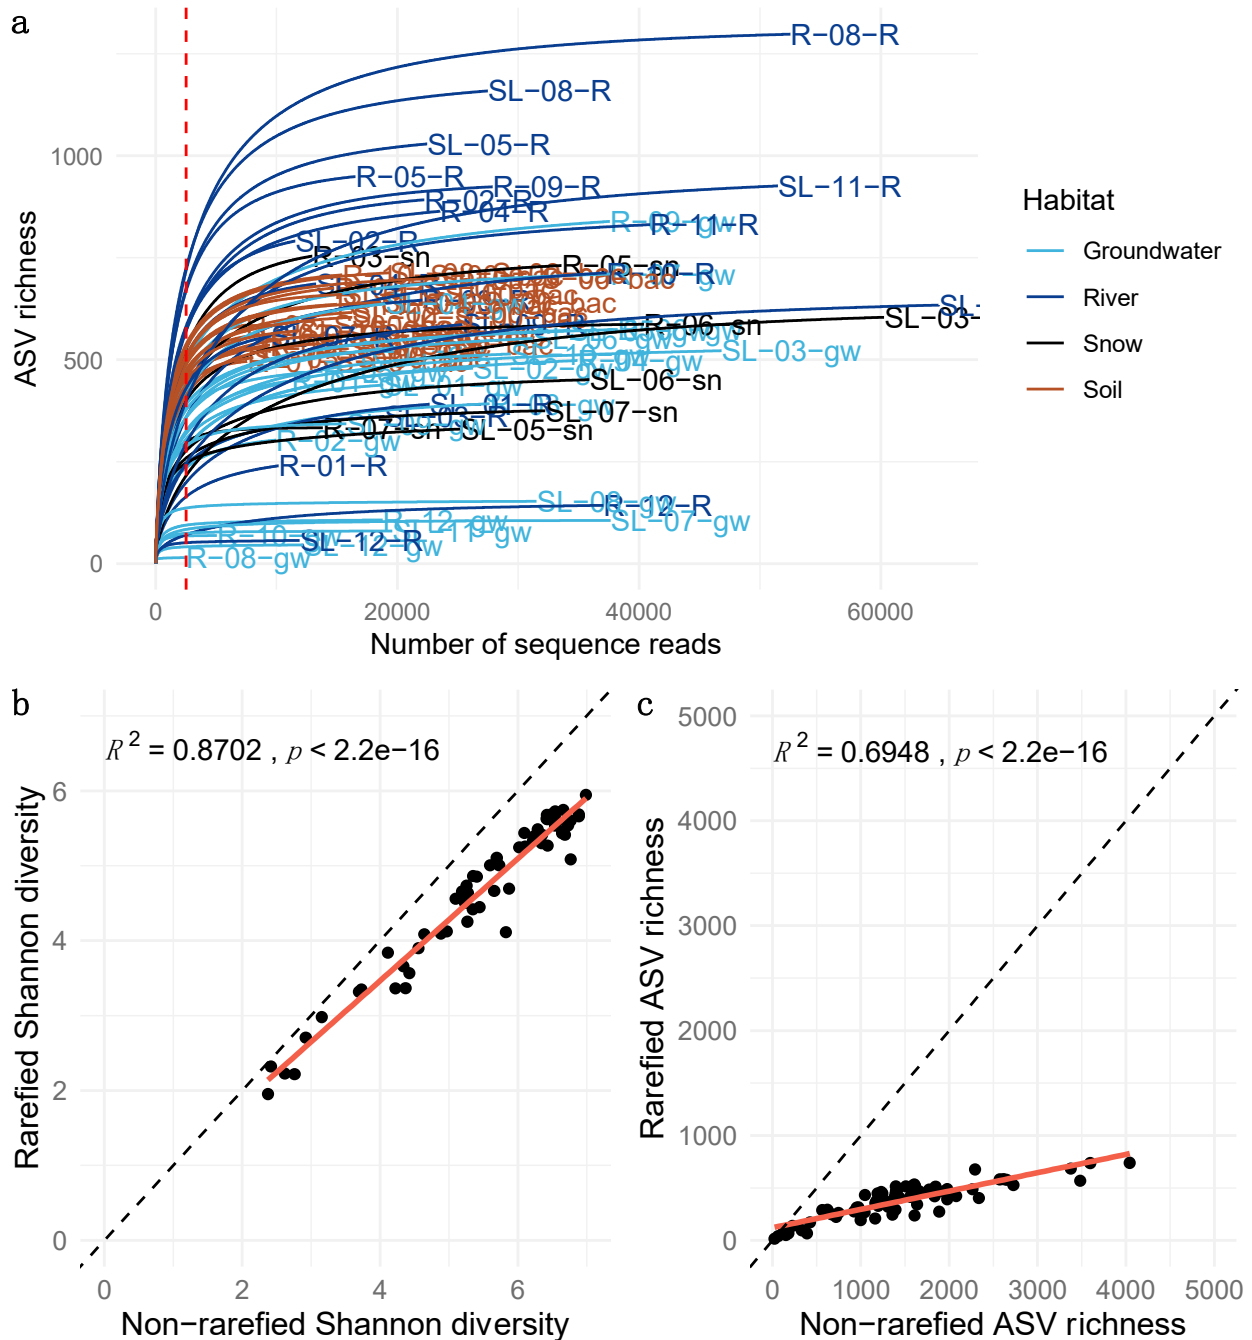

**Figure S1. Rarefaction curve and Spearman correlation between diversity and richness of rarefied and non-rarefied samples.** (a) Rarefaction curve displaying the number of ASVs against the number of sequences for each sample. The vertical red dashed line indicates the rarefaction depth used for all samples (i.e., 2,530 reads per sample). (b) Correlation between calculated Shannon diversity of rarefied and non-rarefied samples. (c) Correlation between ASV richness of rarefied and non-rarefied samples. Linear regression is showed in red, and the dotted line represents a one-to-one theoretical relationship where rarefaction has no impact on diversity and richness. The  $R^2$  denotes the Spearman correlation coefficient ( $n=71$ ).

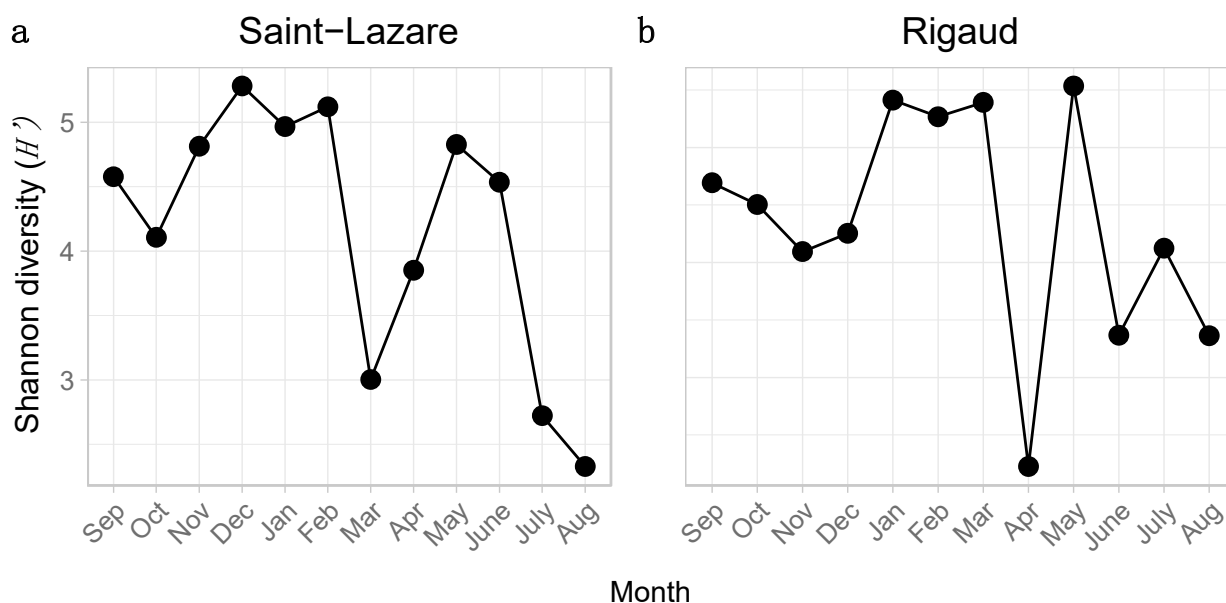

**Figure S2.** Shannon diversity of groundwater bacterial communities of both aquifer across the sampling period. (a) The Saint-Lazare aquifer. (b) The Rigaud aquifer. Only one sample was collected for each month.

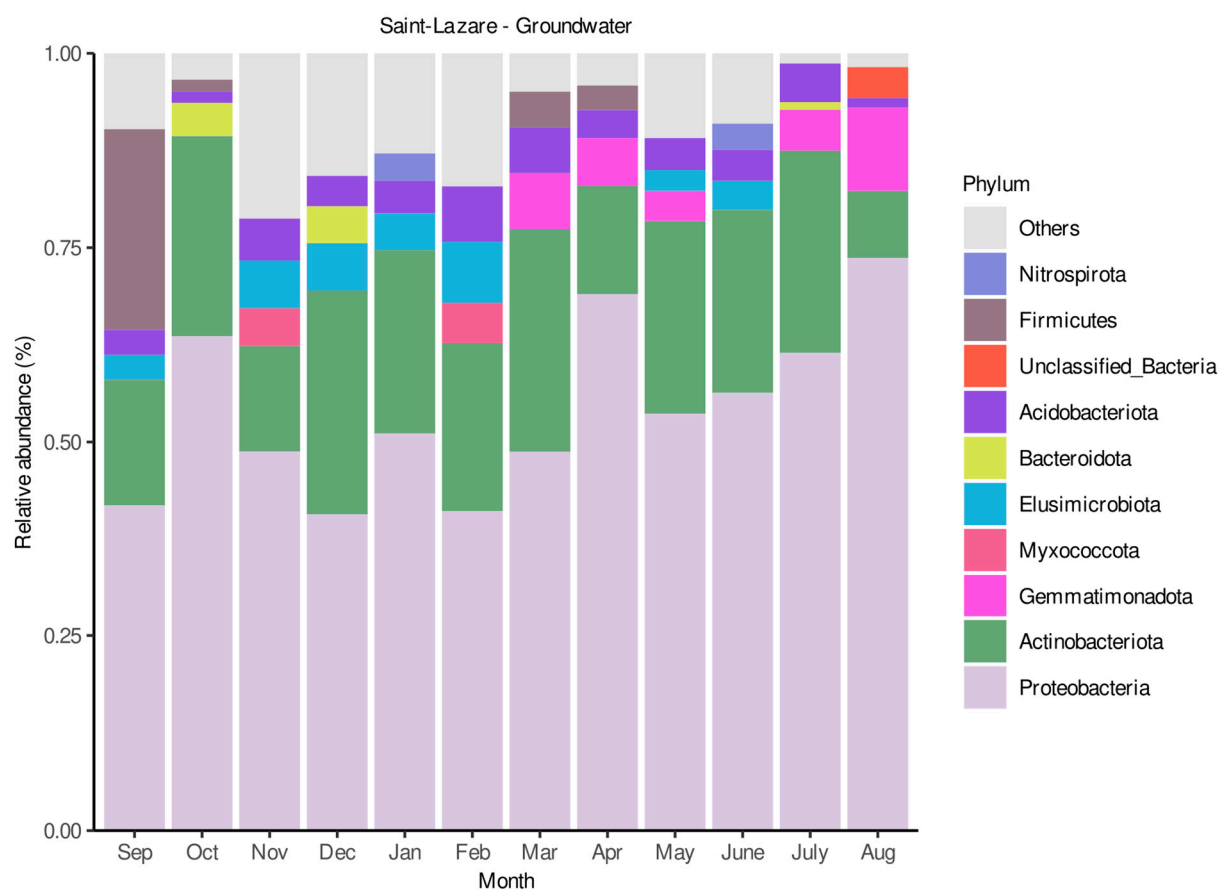

**Figure S3.** Relative abundance (%) of amplicon sequence variant (ASV) at the phylum level in groundwater samples collected monthly at the Saint-Lazare site. For each month, only the five most abundant families are colored.

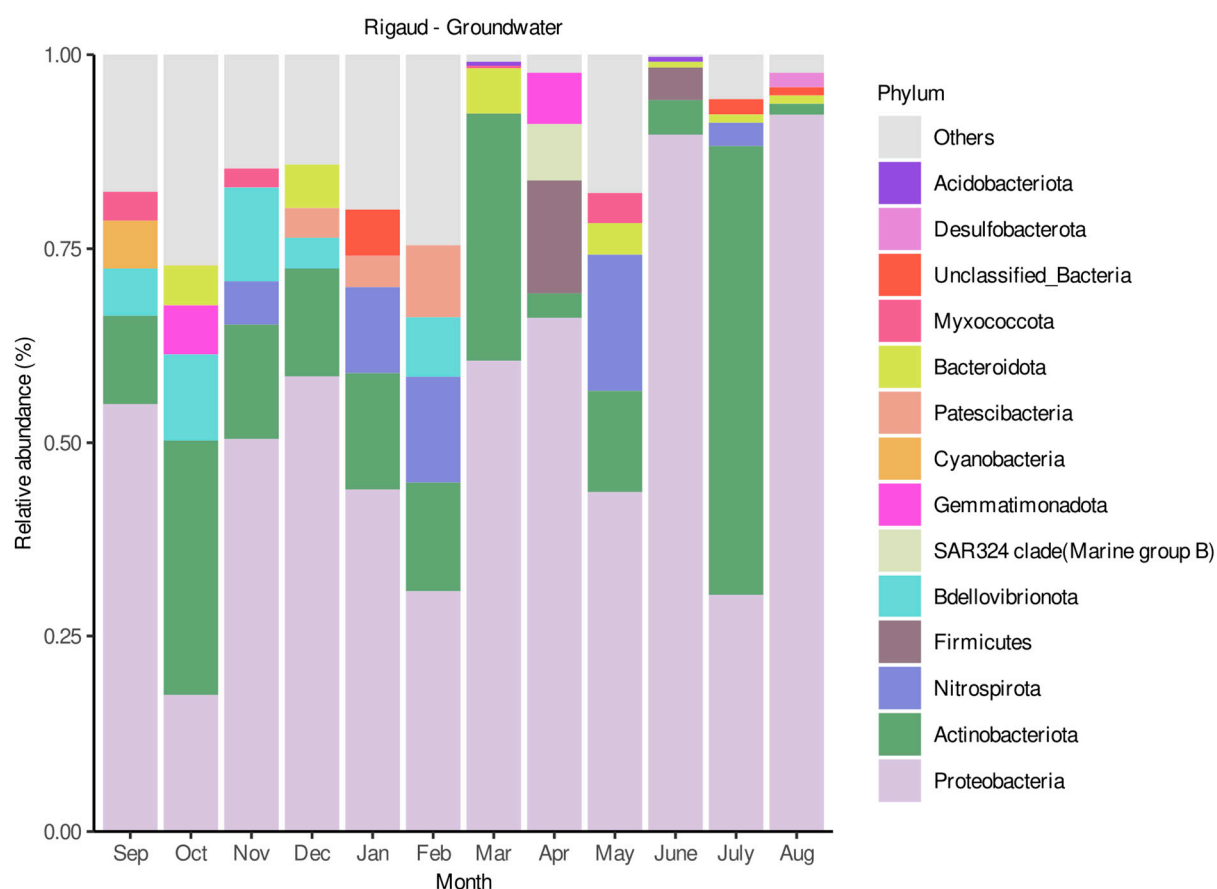

**Figure S4.** Relative abundance (%) of amplicon sequence variant (ASV) at the phylum level in groundwater samples collected monthly at the Rigaud site. For each month, only the five most abundant families are colored.

**Table S1. Maximum and minimum daily average of each month for groundwater level and temperature from both aquifers.** Data was collected by a probe installer semi-permanently in each well. Hourly measures were averaged for each date. Level indicates the height in meter (m) of the water above the probe.

| Month | Saint-Lazare                 |      |                       |      | Rigaud                       |       |                       |      |
|-------|------------------------------|------|-----------------------|------|------------------------------|-------|-----------------------|------|
|       | Groundwater temperature (°C) |      | Groundwater level (m) |      | Groundwater temperature (°C) |       | Groundwater level (m) |      |
|       | Max                          | Min  | Max                   | Min  | Max                          | Min   | Max                   | Min  |
| Sep.  | 7.02                         | 6.87 | 3.20                  | 3.06 | 10.19                        | 9.15  | 0.54                  | 0.40 |
| Oct.  | 7.19                         | 7.02 | 3.06                  | 2.95 | 10.78                        | 10.22 | 0.75                  | 0.38 |
| Nov.  | 7.34                         | 7.20 | 3.13                  | 2.94 | 10.87                        | 10.31 | 1.12                  | 0.94 |
| Dec.  | 7.40                         | 7.34 | 3.12                  | 3.03 | 10.27                        | 8.84  | 1.02                  | 0.90 |
| Jan.  | 7.41                         | 7.39 | 3.08                  | 3.01 | 7.52                         | 6.75  | 1.84                  | 1.42 |
| Feb.  | 7.39                         | 7.31 | 3.05                  | 2.98 | 6.76                         | 6.69  | 1.41                  | 1.13 |
| Mar.  | 7.31                         | 5.59 | 3.40                  | 2.74 | 6.69                         | 4.32  | 2.56                  | 1.12 |
| Apr.  | 5.65                         | 5.22 | 3.76                  | 3.07 | 4.27                         | 3.61  | 2.56                  | 1.83 |
| May   | 6.05                         | 5.57 | 3.78                  | 3.68 | 4.67                         | 3.71  | 1.81                  | 1.27 |
| June  | 6.29                         | 6.07 | 3.68                  | 3.54 | 6.36                         | 4.71  | 1.25                  | 0.90 |
| July  | 6.41                         | 6.30 | 3.55                  | 3.40 | 8.22                         | 6.42  | 0.89                  | 0.66 |
| Aug.  | 6.54                         | 6.41 | 3.39                  | 3.24 | 9.87                         | 8.28  | 0.69                  | 0.60 |

**Table S2. Physicochemical qualities of groundwater.** Dissolved inorganic carbon (DIC); Dissolved organic carbon (DOC); Nitrites (NO<sub>2</sub>); Nitrates (NO<sub>3</sub>); Ammonium and ammonia (NH<sub>x</sub>); Dissolved oxygen (DO).

| Month | Saint-Lazare  |               |                           |                           |                           |           | Rigaud        |               |                           |                           |                           |           |
|-------|---------------|---------------|---------------------------|---------------------------|---------------------------|-----------|---------------|---------------|---------------------------|---------------------------|---------------------------|-----------|
|       | DIC<br>(mg/L) | DOC<br>(mg/L) | NO <sub>2</sub><br>(mg/L) | NO <sub>3</sub><br>(mg/L) | NH <sub>x</sub><br>(mg/L) | DO<br>(%) | DIC<br>(mg/L) | DOC<br>(mg/L) | NO <sub>2</sub><br>(mg/L) | NO <sub>3</sub><br>(mg/L) | NH <sub>x</sub><br>(mg/L) | DO<br>(%) |
| Sep.  | 2.10          | 0.50          | 0.00                      | 0.04                      | 0.01                      | 101.20    | 60.90         | 1.10          | 0.00                      | 1.16                      | 0.02                      | 3.80      |
| Oct.  | 2.30          | 0.50          | 0.00                      | 0.05                      | 0.01                      | 100.50    | 67.20         | 1.00          | 0.00                      | 5.52                      | 0.02                      | 11.00     |
| Nov.  | 2.00          | 0.30          | 0.00                      | 0.05                      | 0.00                      | 89.90     | 67.20         | 1.10          | 0.00                      | 9.35                      | 0.03                      | 11.00     |
| Dec.  | 2.52          | 0.57          | 0.00                      | 0.05                      | 0.00                      | 101.70    | 67.17         | 1.21          | 0.00                      | 7.94                      | 0.01                      | 19.60     |
| Jan.  | 1.90          | 0.50          | 0.00                      | 0.05                      | 0.00                      | 103.50    | 65.10         | 1.20          | 0.00                      | 5.85                      | 0.00                      | 3.12      |
| Feb.  | 2.20          | 0.00          | 0.00                      | 0.05                      | 0.01                      | 100.00    | 68.20         | 1.80          | 0.00                      | 4.18                      | 0.00                      | 3.70      |
| Mar.  | 5.00          | 0.60          | 0.00                      | 0.05                      | 0.00                      | 99.30     | 107.50        | 1.20          | 0.04                      | 6.69                      | 0.01                      | 30.50     |
| Apr.  | 2.60          | 0.00          | 0.00                      | 0.08                      | 0.01                      | 101.00    | 58.50         | 0.20          | 0.00                      | 4.74                      | 0.02                      | 45.70     |
| May   | 2.60          | 0.00          | 0.00                      | 0.07                      | 0.07                      | 100.70    | 65.40         | 0.50          | 0.00                      | 6.19                      | 0.01                      | 18.50     |
| June  | 2.80          | 0.00          | 0.00                      | 0.09                      | 0.01                      | 98.80     | 68.10         | 0.00          | 0.01                      | 6.56                      | 0.01                      | 18.80     |
| July  | 2.20          | 0.40          | 0.00                      | 0.05                      | 0.01                      | 99.10     | 68.30         | 0.90          | 0.01                      | 2.64                      | 0.00                      | 36.70     |
| Aug.  | 2.10          | 0.20          | 0.01                      | 0.07                      | 0.01                      | 94.30     | 60.40         | 0.60          | 0.01                      | 1.18                      | 0.00                      | 9.70      |

**Table S3. PERMANOVA results for all habitats.** Variation in bacterial community composition explained by habitat type (groundwater, river, soil, snow, discharge) for both sites, tested by PERMANOVA of Hellinger-transformed ASV abundance data using the Bray-Curtis dissimilarity index.

|              |          | Df | R <sup>2</sup> | F      | p     |
|--------------|----------|----|----------------|--------|-------|
| Saint-Lazare | Habitat  | 6  | 0.5129         | 7.0189 | 0.001 |
|              | Residual | 40 | 0.48713        |        |       |
|              | Total    | 46 | 1              |        |       |
| Rigaud       | Habitat  | 3  | 0.4283         | 7.7403 | 0.001 |
|              | Residual | 31 | 0.5717         |        |       |
|              | Total    | 34 | 1              |        |       |

**Table S4. PERMANOVA results for groundwater.** Variation in bacterial community composition in aquifer explained by period (pre-recharge, post-recharge) for both sites, tested by PERMANOVA of Hellinger-transformed ASV abundance data using the Bray-Curtis dissimilarity index.

|              |          | Df | R <sup>2</sup> | F      | p     |
|--------------|----------|----|----------------|--------|-------|
| Saint-Lazare | Period   | 1  | 0.2535         | 3.3965 | 0.004 |
|              | Residual | 10 | 0.7464         |        |       |
|              | Total    | 11 | 1              |        |       |
| Rigaud       | Period   | 1  | 0.1706         | 2.0571 | 0.033 |
|              | Residual | 10 | 0.8293         |        |       |
|              | Total    | 11 | 1              |        |       |

**Table S5.** Shannon diversity of groundwater bacterial communities of both aquifer across the sampling period.

| Month     | Saint-Lazare | Rigaud  |
|-----------|--------------|---------|
| September | 4.57791      | 4.69314 |
| October   | 4.10644      | 4.50448 |
| November  | 4.81330      | 4.09395 |
| December  | 5.28176      | 4.25329 |
| January   | 4.96625      | 5.41253 |
| February  | 5.11970      | 5.26758 |
| March     | 3.00358      | 5.39254 |

|        |         |         |
|--------|---------|---------|
| April  | 3.85182 | 2.22596 |
| May    | 4.82736 | 5.53529 |
| June   | 4.53546 | 3.36711 |
| July   | 2.72338 | 4.12376 |
| August | 2.32898 | 3.36365 |

**Table S6. Average contribution (%) of each source to groundwater bacterial diversity of both aquifers.** Potential sources for both aquifers include groundwater, snow, and soil. For the Rigaud aquifer river were also considered given the groundwater-river connections. For each source, only samples collected up to three months prior to groundwater sample assigned as sink were included.

| Aquifer      | Sink                      | Groundwater | River | Snow  | Soil  | Unknown |
|--------------|---------------------------|-------------|-------|-------|-------|---------|
| Saint-Lazare | Oct. groundwater          | 68.77       | NA    | NA    | 4.33  | 26.90   |
|              | Nov. groundwater          | 68.50       | NA    | NA    | 2.26  | 29.24   |
|              | Oct. groundwater          | 68.77       | NA    | NA    | 4.33  | 26.90   |
|              | Dec. groundwater          | 52.50       | NA    | 1.85  | 9.73  | 35.91   |
|              | Jan. groundwater          | 81.09       | NA    | 0.63  | 1.15  | 17.13   |
|              | Feb. groundwater          | 79.51       | NA    | 0.30  | 1.17  | 19.01   |
|              | Mar. Groundwater          | 84.98       | NA    | 0.34  | 0     | 14.68   |
|              | Apr. groundwater          | 61.96       | NA    | 18.93 | NA    | 19.11   |
|              | May groundwater           | 61.21       | NA    | 1.00  | 1.94  | 35.85   |
|              | July groundwater          | 87.07       | NA    | NA    | 0.06  | 12.88   |
|              | June groundwater          | 63.38       | NA    | 0     | 2.55  | 34.07   |
|              | Aug. groundwater          | 80.72       | NA    | NA    | 0     | 19.28   |
|              | <b>Average</b>            | 71.54       | NA    | 3.29  | 2.50  | 24.25   |
|              | <b>Standard deviation</b> | 10.92       | NA    | 6.92  | 2.85  | 8.29    |
| Rigaud       | Oct. groundwater          | 17.10       | 0.25  | NA    | 0.43  | 82.23   |
|              | Nov. groundwater          | 27.79       | 0.64  | NA    | 0.26  | 71.30   |
|              | Dec. groundwater          | 24.67       | 0.20  | 0.04  | 0.10  | 74.99   |
|              | Jan. groundwater          | 46.98       | 1.69  | 0.89  | 0.57  | 49.88   |
|              | Feb. groundwater          | 55.65       | 1.49  | 0.16  | 0.08  | 42.62   |
|              | Mar. groundwater          | 2.66        | 5.36  | 62.85 | 0.23  | 28.90   |
|              | Apr. groundwater          | 30.96       | 0.09  | 0.18  | NA    | 68.77   |
|              | May groundwater           | 40.72       | 7.03  | 1.14  | 0.33  | 50.77   |
|              | June groundwater          | 2.59        | 0     | 3.29  | 0     | 94.12   |
|              | July groundwater          | 62.90       | 2.59  | NA    | 10.35 | 24.17   |
|              | Aug. groundwater          | 29.96       | 0.69  | NA    | 0.00  | 69.34   |
|              | <b>Average</b>            | 31.09       | 1.82  | 9.79  | 1.23  | 59.73   |
|              | <b>Standard deviation</b> | 19.57       | 2.34  | 23.42 | 3.21  | 22.17   |

**Table S7. Average contribution (%) of each source to river bacterial diversity of both sites.** Potential sources for both aquifers include groundwater, snow, and river. For each source, only samples collected up to three months prior to river sample assigned as sink were included.

| Site         | Sink       | Groundwater | River | Snow | Unknown |
|--------------|------------|-------------|-------|------|---------|
| Saint-Lazare | Oct. river | 4.65        | 18.00 | NA   | 77.35   |
|              | Nov. river | 4.10        | 16.75 | NA   | 79.15   |
|              | Dec. river | 4.37        | 37.61 | 0.08 | 57.94   |
|              | Jan. river | 4.86        | 64.27 | 0.35 | 30.52   |
|              | Feb. river | NA          | NA    | NA   | NA      |
|              | Mar. river | 3.41        | 44.88 | 2.89 | 48.83   |
|              | Apr. river | 3.03        | 53.26 | 1.36 | 42.35   |
|              | May. river | 0.45        | 14.81 | 0.08 | 84.66   |

|               |                           |       |       |       |       |
|---------------|---------------------------|-------|-------|-------|-------|
|               | June. river               | 0.51  | 24.80 | 0.00  | 74.69 |
|               | July. river               | 3.76  | 26.71 | NA    | 69.53 |
|               | Aug. river                | 0.95  | 36.22 | NA    | 62.83 |
|               | <b>Average</b>            | 3.01  | 33.73 | 0.79  | 62.78 |
|               | <b>Standard deviation</b> | 1.73  | 16.61 | 1.14  | 17.71 |
| <b>Rigaud</b> | Nov. river                | 2.22  | 21.60 | NA    | 76.18 |
|               | Oct. river                | 15.33 | 16.36 | NA    | 68.31 |
|               | Dec. river                | 0.97  | 46.80 | 2.42  | 49.80 |
|               | Jan. river                | 0.65  | 47.59 | 10.05 | 41.71 |
|               | Feb. river                | NA    | NA    | NA    | NA    |
|               | Mar. river                | NA    | NA    | NA    | NA    |
|               | Apr. river                | 3.78  | 52.66 | 2.92  | 40.64 |
|               | May. river                | 1.71  | 22.40 | 0.62  | 75.27 |
|               | June. river               | 1.12  | 19.88 | 0.10  | 78.91 |
|               | July. river               | 0.93  | 31.02 | NA    | 68.05 |
|               | Aug. river                | 0.00  | 64.59 | NA    | 35.41 |
|               | <b>Average</b>            | 2.84  | 33.95 | 2.88  | 55.20 |
|               | <b>Standard deviation</b> | 4.51  | 17.46 | 3.68  | 20.98 |
